# Supplementary material for: Genome-scale detection of hypermethylated CpG islands in circulating cell-free DNA of hepatocellular carcinoma patients
Source: PubMed Central journal article supplement — Cell Res. 2015 Oct 30;25(11):1250–64. doi: 10.1038/cr.2015.126 (PMC4650428; doi:10.1038/cr.2015.126), 2015-10-30
Supplement: cr2015126x1.pdf [file cr2015126x1.pdf]

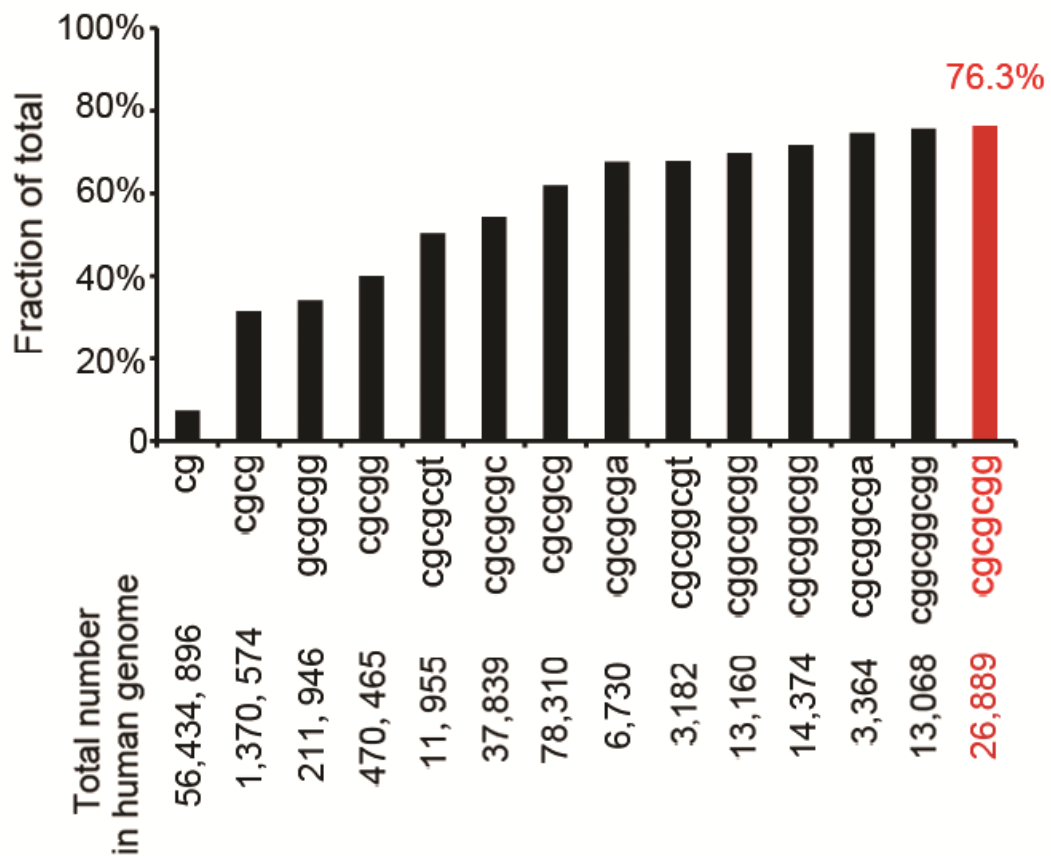

**Figure S1. Information of different CpG tandems.**

The number of various CpG tandems in human genome and the proportion in CpG islands were shown. The proportion is positively correlated with the number of the CpG sites in the CpG tandem. The CGCGCG tandem applied in this study is shown in red.
