# Supplementary material for: Genome-scale detection of hypermethylated CpG islands in circulating cell-free DNA of hepatocellular carcinoma patients
Source: PubMed Central journal article supplement — Cell Res. 2015 Oct 30;25(11):1250–64. doi: 10.1038/cr.2015.126 (PMC4650428; doi:10.1038/cr.2015.126), 2015-10-30
Supplement: cr2015126x2.pdf [file cr2015126x2.pdf]

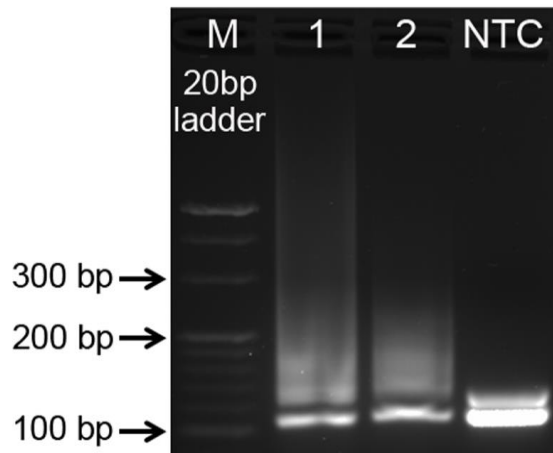

**Figure S2. Gel results of MCTA-Seq.**

The MCTA-Seq results of the genomic DNA extracted from WBCs (lane 1) and the DNA sonicated to an average size of 250 bp (lane 2) were shown.

M: marker. NTC: no template control.
