# Supplementary material for: Genome-scale detection of hypermethylated CpG islands in circulating cell-free DNA of hepatocellular carcinoma patients
Source: PubMed Central journal article supplement — Cell Res. 2015 Oct 30;25(11):1250–64. doi: 10.1038/cr.2015.126 (PMC4650428; doi:10.1038/cr.2015.126), 2015-10-30
Supplement: cr2015126x3.pdf [file cr2015126x3.pdf]

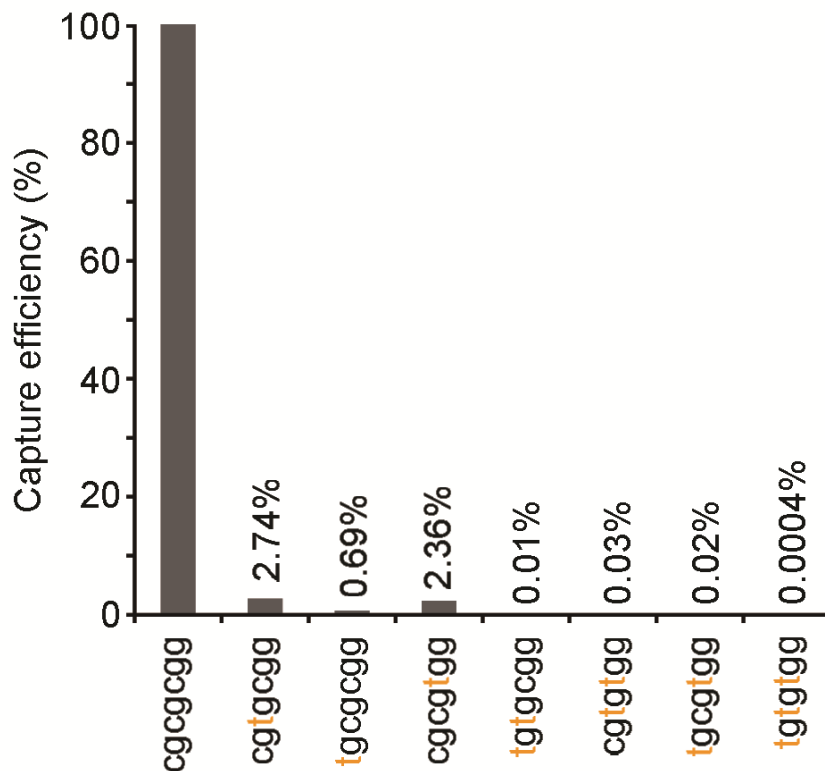

**Figure S3. Selective amplification of the CGCGCGG sequence.**

For each type of sequence, the amplification efficiency is calculated as the average number of mapped reads in the FMG for all of this sequence in the human genome. The amplification efficiency of the CGCGCGG sequence is set as 100%, and the efficiencies of the TG-CG-chimeric sequences, as modeling the partially methylated CGCGCGG sequences, are shown as relative values to the CGCGCGG sequence. Note that the amplification efficiency of the CGCGCGG sequence is about 50-fold higher than the one-TG-chimeric sequences (TGTGCGG, CGTGTGG and TGCCTGG), and 5000-fold higher than the two-TG-chimeric sequences (TGTGCGG, CGTGTGG and TGCCTGG), and 200,000-fold higher than the TGTGTGG sequence.
