# Supplementary material for: Genome-scale detection of hypermethylated CpG islands in circulating cell-free DNA of hepatocellular carcinoma patients
Source: PubMed Central journal article supplement — Cell Res. 2015 Oct 30;25(11):1250–64. doi: 10.1038/cr.2015.126 (PMC4650428; doi:10.1038/cr.2015.126), 2015-10-30
Supplement: cr2015126x4.pdf [file cr2015126x4.pdf]

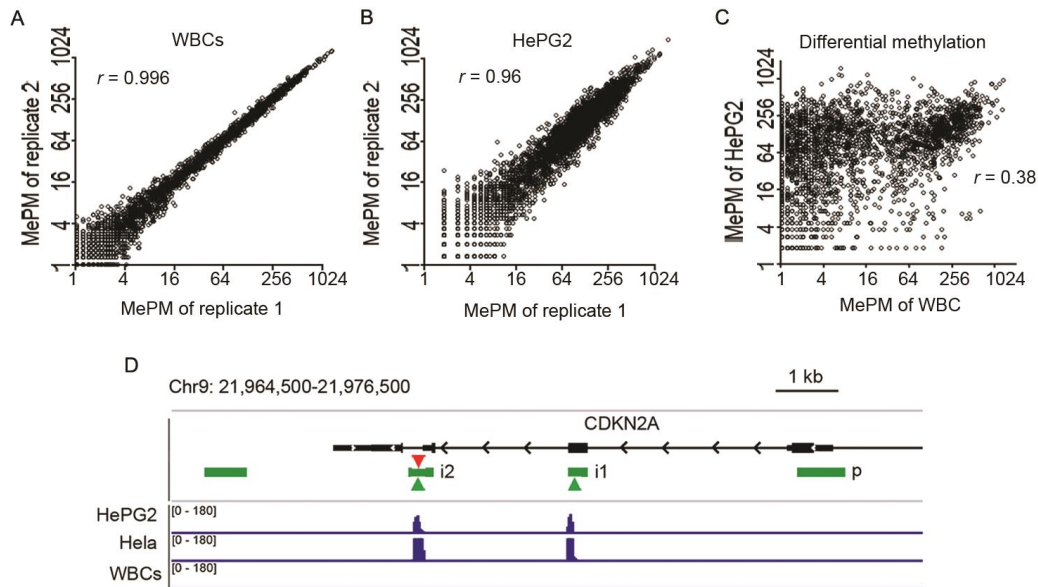

**Figure S4. MCTA-Seq reproducibility and differential methylation.**

**(A, B)** Comparison of methylation profiles between technical replicates of WBCs **(A)** and HePG2 cells **(B)** shows high reproducibility of MCTA-Seq.

**(C)** Comparison of methylation profiles between WBCs and HePG2 cells shows differential methylation between two cell types.

**(D)** The genomic region of the *CDKN2A* gene contains 4 CpG islands, including one promoter CGI (p), two intragenic CGIs (i1 and i2) and one intergenic CGI. The intragenic CGI i1 contains one CGCGCGG tandem and i2 contains two CGCGCGG tandems (red and green triangles indicate the CGCGCGG tandems positioned at the forward and the reverse strands, respectively), whereas there are no CGCGCGG tandems in the promoter and the intergenic CGIs.
