# Supplementary material for: Genome-scale detection of hypermethylated CpG islands in circulating cell-free DNA of hepatocellular carcinoma patients
Source: PubMed Central journal article supplement — Cell Res. 2015 Oct 30;25(11):1250–64. doi: 10.1038/cr.2015.126 (PMC4650428; doi:10.1038/cr.2015.126), 2015-10-30
Supplement: cr2015126x5.pdf [file cr2015126x5.pdf]

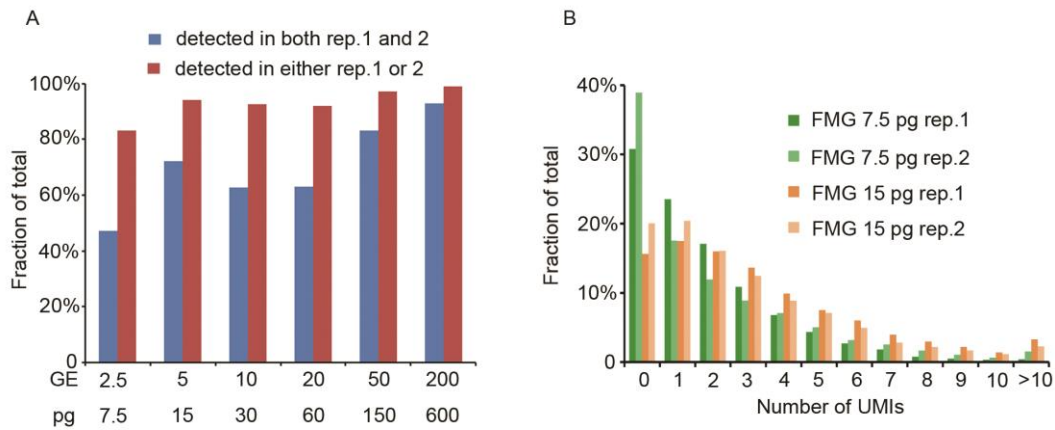

**Figure S5. Low detection limits of MCTA-Seq.**

**(A)** Of all 3,579 CGIs that were not detected in both WBCs replicates (MePM = 0), the proportion of the loci positively detected in both (blue) or either (red) of the technical replicates of each dilution group (MePM > 0) were shown in histograms. The amount (pg) and the haploid genomic equivalents (GE) of the spiked FMG for each dilution group were shown.

**(B)** Of the 3,579 CGIs, the proportion of the loci detected with different number of UMIs in technical replicates of the 7.5 pg and 15 pg dilution groups were shown in histograms.
