# Supplementary material for: Genome-scale detection of hypermethylated CpG islands in circulating cell-free DNA of hepatocellular carcinoma patients
Source: PubMed Central journal article supplement — Cell Res. 2015 Oct 30;25(11):1250–64. doi: 10.1038/cr.2015.126 (PMC4650428; doi:10.1038/cr.2015.126), 2015-10-30
Supplement: cr2015126x6.pdf [file cr2015126x6.pdf]

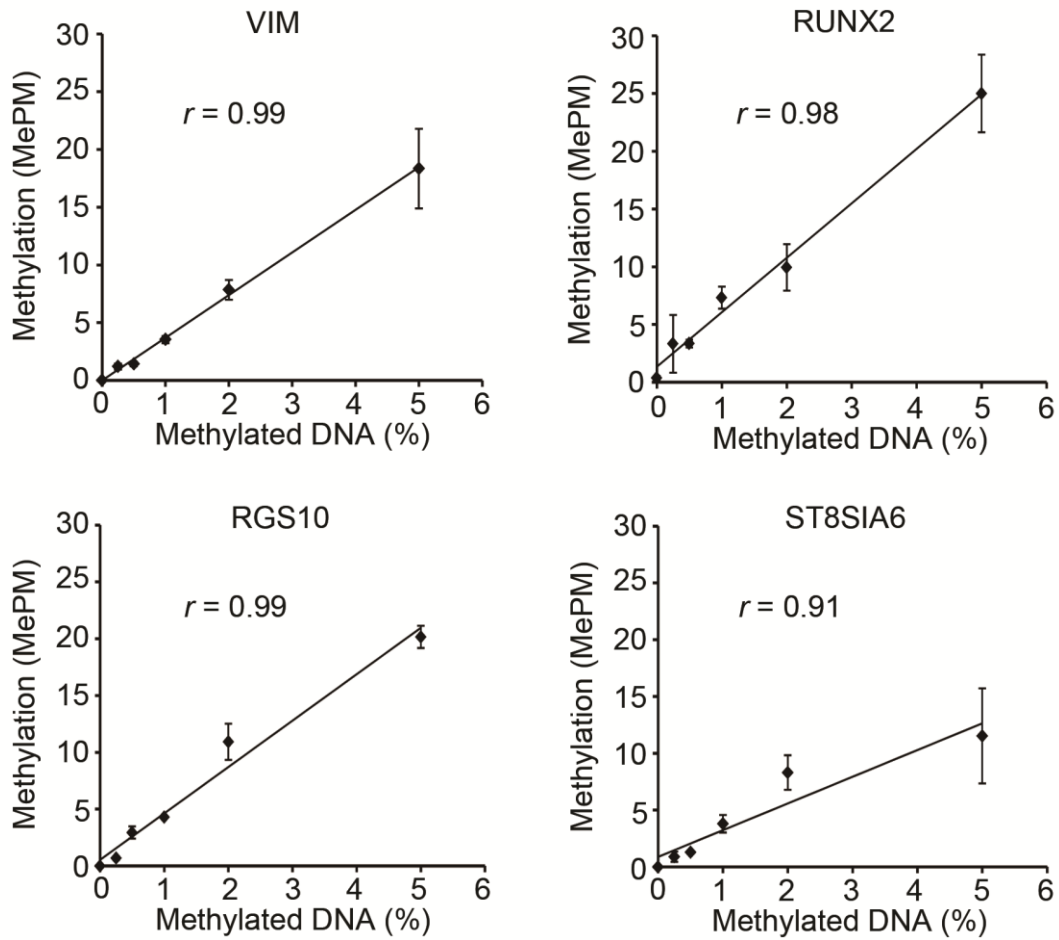

**Figure S6 Quantitative performance of MCTA-Seq.**

The MePM values of the promoter CGI of VIM, RUNX2, RGS10 and ST8SIA6 (two technical replicates) were plotted against the varying percentages of FMG to WBCs; a linear fit was observed. The error bars represent means  $\pm$  s.d.
