# Supplementary material for: Genome-scale detection of hypermethylated CpG islands in circulating cell-free DNA of hepatocellular carcinoma patients
Source: PubMed Central journal article supplement — Cell Res. 2015 Oct 30;25(11):1250–64. doi: 10.1038/cr.2015.126 (PMC4650428; doi:10.1038/cr.2015.126), 2015-10-30
Supplement: cr2015126x7.pdf [file cr2015126x7.pdf]

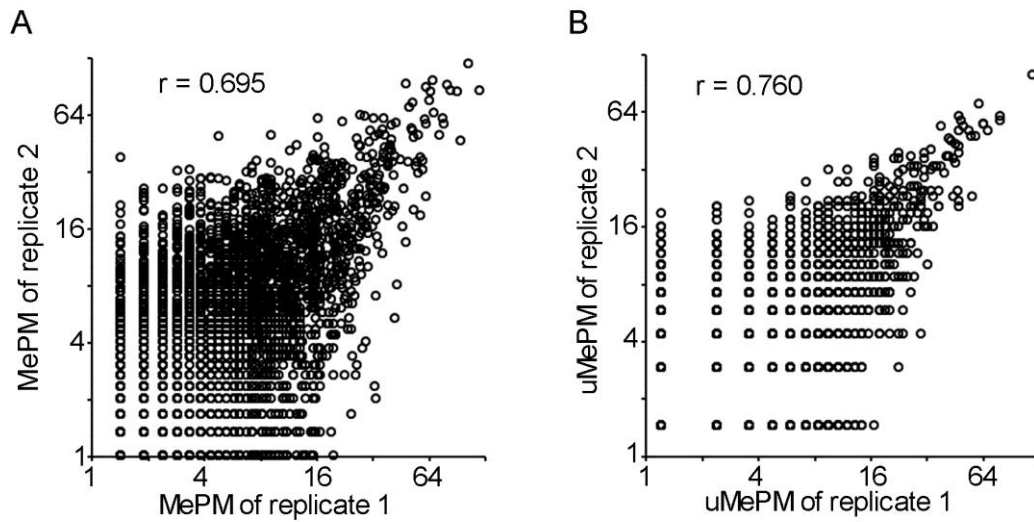

**Figure S7. Comparison of MePM and uMePM.**

Scatterplots showing the replicates of the 7.5 pg experiments using read counts (MePM) and UMI-adjusted counts (uMePM). The correlation efficiency increases from 0.695 for MePM to 0.760 for uMePM. Loci ( $n = 6289$ ) of sensitivity  $\leq 5\%$  were included.
