# Supplementary material for: Genome-scale detection of hypermethylated CpG islands in circulating cell-free DNA of hepatocellular carcinoma patients
Source: PubMed Central journal article supplement — Cell Res. 2015 Oct 30;25(11):1250–64. doi: 10.1038/cr.2015.126 (PMC4650428; doi:10.1038/cr.2015.126), 2015-10-30
Supplement: cr2015126x8.pdf [file cr2015126x8.pdf]

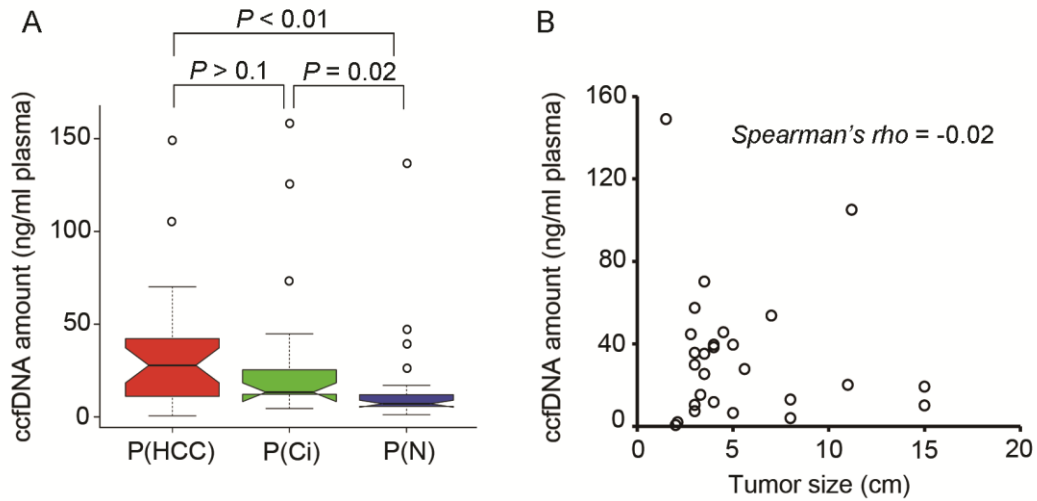

**Figure S8. Plasma ccfDNA amount.**

**(A)** Box plots showing the amount of ccfDNA (ng/ml plasma, determined by using the Qubit HsDNA Kits) for HCC patients (P(HCC)), cirrhosis patients (P(Ci)) and normal individuals (P(N)). Two-tailed MWW test. The ccfDNA concentration in plasma ranged from 0.6 to 140 ng/ml plasma in HCC patients. **(B)** The ccfDNA amount is uncorrelated with the tumor size.
