# Supplementary material for: Genome-scale detection of hypermethylated CpG islands in circulating cell-free DNA of hepatocellular carcinoma patients
Source: PubMed Central journal article supplement — Cell Res. 2015 Oct 30;25(11):1250–64. doi: 10.1038/cr.2015.126 (PMC4650428; doi:10.1038/cr.2015.126), 2015-10-30
Supplement: cr2015126x9.pdf [file cr2015126x9.pdf]

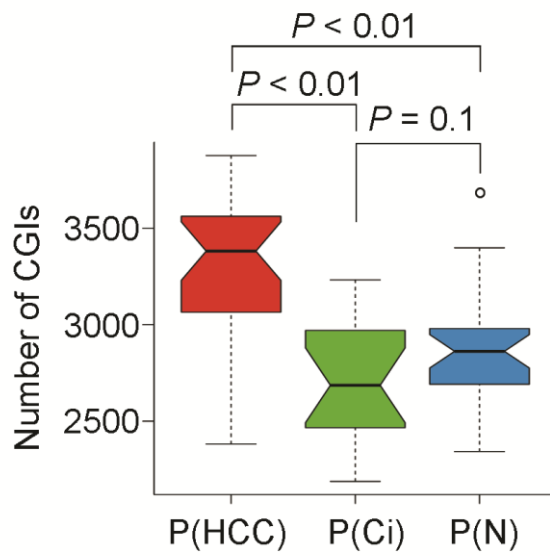

**Figure S9. The number of CGI loci detected in plasma cfDNA.**

Box plots showing the number of CGI loci detected in plasma obtained from HCC patients (P(HCC)), cirrhosis patients (P(Ci)) and normal individuals (P(N)). Two-tailed MWW test.
