# Supplementary material for: Genome-scale detection of hypermethylated CpG islands in circulating cell-free DNA of hepatocellular carcinoma patients
Source: PubMed Central journal article supplement — Cell Res. 2015 Oct 30;25(11):1250–64. doi: 10.1038/cr.2015.126 (PMC4650428; doi:10.1038/cr.2015.126), 2015-10-30
Supplement: cr2015126x10.pdf [file cr2015126x10.pdf]

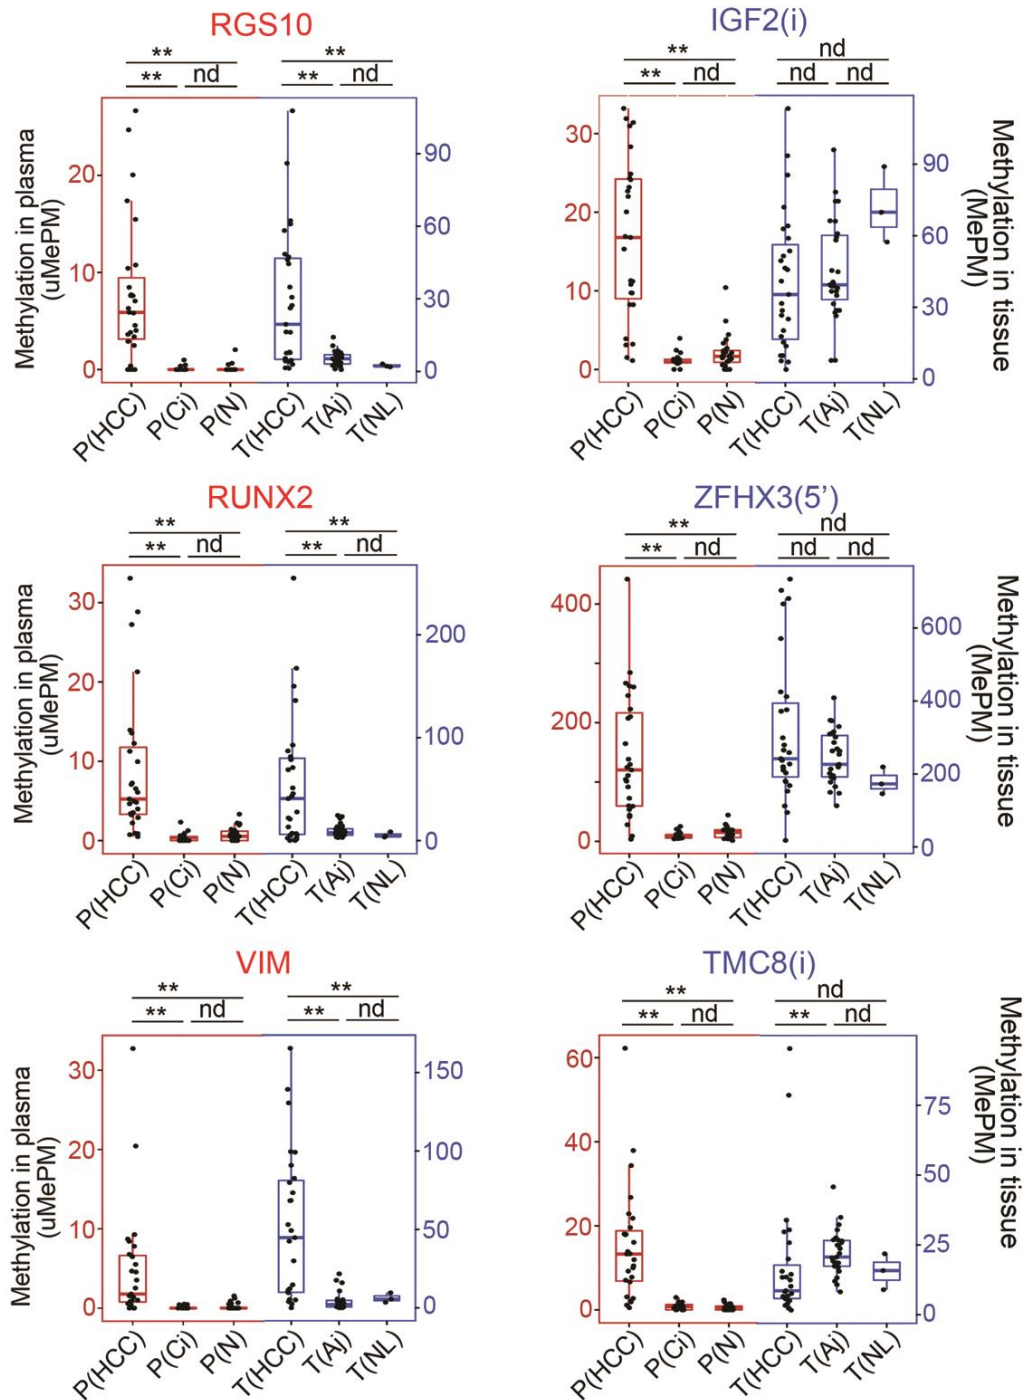

**Figure S10. Type I and type II HCC-detecting markers.**

Boxplots of the representative markers of the type I (RGS10, RUNX2 and VIM) and the type II [IGF2(i), ZFH3(5') AND TMC8(i)] HCC-detecting markers showing their methylation in plasma (red) or tissues (blue) samples. \*\*:  $P < 0.01$ ; nd: no statistical difference. Two-tailed MWW test.
