# Supplementary material for: Genome-scale detection of hypermethylated CpG islands in circulating cell-free DNA of hepatocellular carcinoma patients
Source: PubMed Central journal article supplement — Cell Res. 2015 Oct 30;25(11):1250–64. doi: 10.1038/cr.2015.126 (PMC4650428; doi:10.1038/cr.2015.126), 2015-10-30
Supplement: cr2015126x11.pdf [file cr2015126x11.pdf]

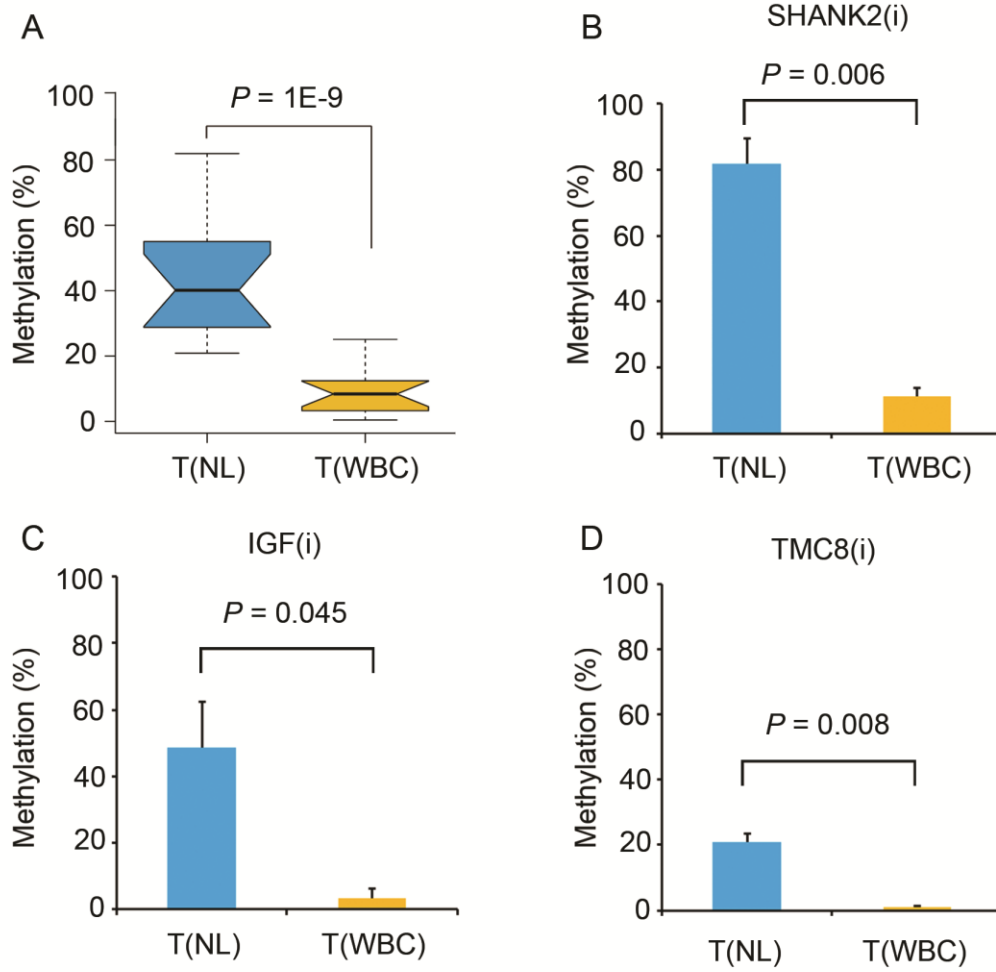

**Figure S11. Tissue-specific methylation of the type II markers.**

Box plots showing the RRBS results of (A) 15 type II marker, (B) SHANK2(i), (C) IGF2(i) and (D) TMC8(i) for the normal live and WBCs.
