# Supplementary material for: Genome-scale detection of hypermethylated CpG islands in circulating cell-free DNA of hepatocellular carcinoma patients
Source: PubMed Central journal article supplement — Cell Res. 2015 Oct 30;25(11):1250–64. doi: 10.1038/cr.2015.126 (PMC4650428; doi:10.1038/cr.2015.126), 2015-10-30
Supplement: cr2015126x12.pdf [file cr2015126x12.pdf]

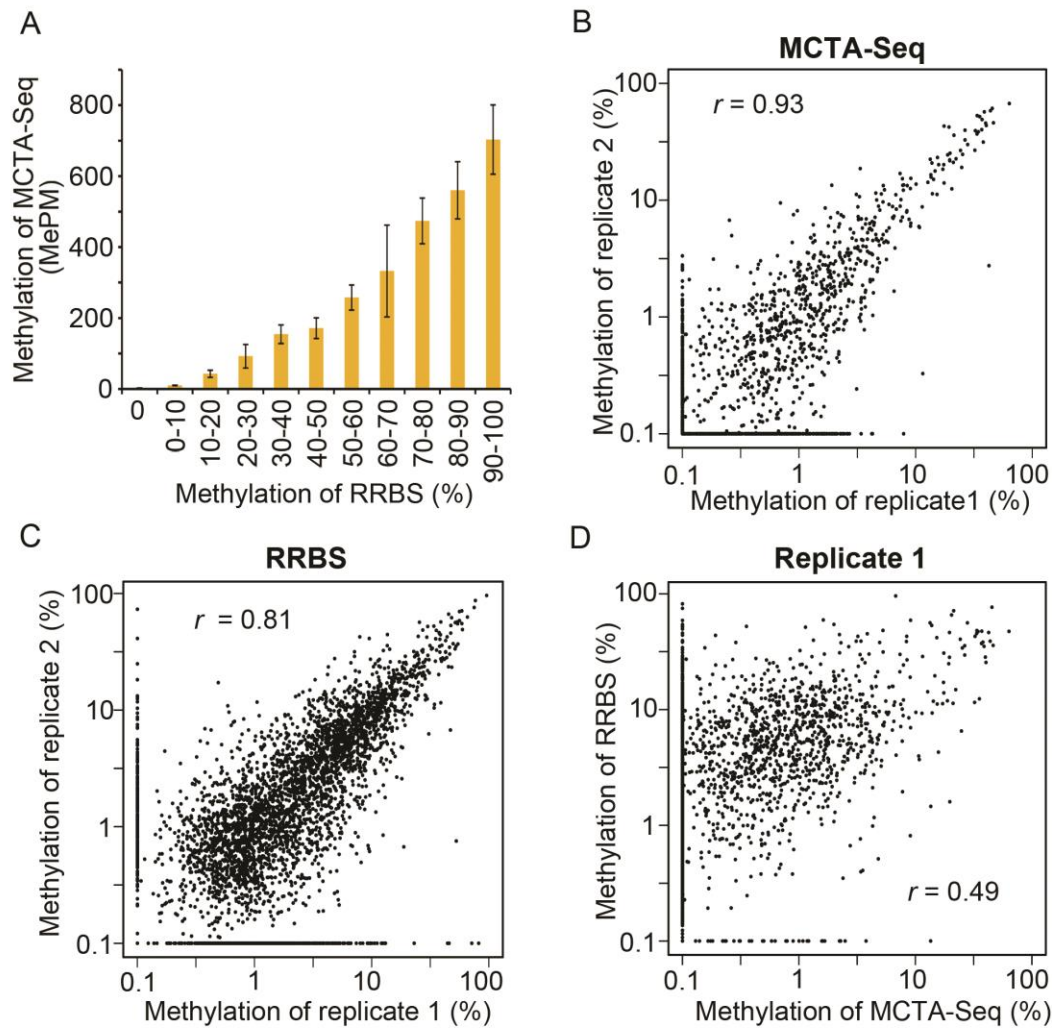

**Figure S12. Comparison of MCTA-Seq and RRBS.**

**(A)** The MePM values of the CGCGCGG sequence with different methylation levels determined by RRBS of the sample samples are shown. The results of two biological liver tissue sample o replicates are shown. The error bars represent means  $\pm$  s.d. **(B)** The absolute methylation level of a CGI was estimated for the MCTA-Seq data by means of the linear relationship between the MePM value and the dilution ratio of the methylated DNA, and the results of two biological replicates are shown. **(C)** The methylation levels determined by RRBS of

two biological replicates are shown. **(D)** Comparison between the MCTA-Seq and RRBS results for biological replicate 1. A total of 4,155 CGIs having high correlation ( $r > 0.9$ ) between the MePM value and the dilution ratio of the methylated DNA and more than 10 detected CpGs in both RRBS data were selected for **(B-D)**. Note that the methylation level assessed by MCTA-Seq was generally lower than that determined by RRBS.
