# Supplementary material for: Genome-scale detection of hypermethylated CpG islands in circulating cell-free DNA of hepatocellular carcinoma patients
Source: PubMed Central journal article supplement — Cell Res. 2015 Oct 30;25(11):1250–64. doi: 10.1038/cr.2015.126 (PMC4650428; doi:10.1038/cr.2015.126), 2015-10-30
Supplement: cr2015126x13.pdf [file cr2015126x13.pdf]

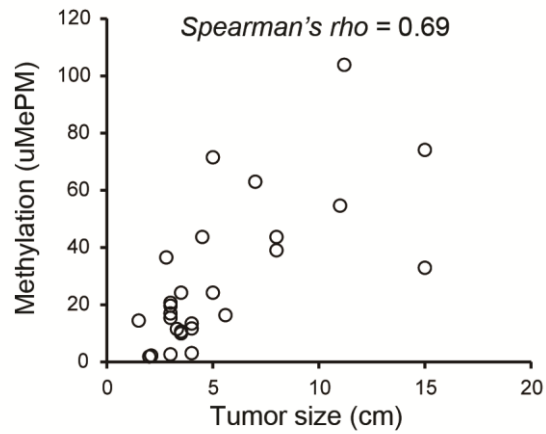

**Figure S13. Tumor size and the methylation marker comparison.**

The correlation between the total uMePM value of 4 CGIs (RGS10, ST8SIA6, VIM and RUNX2) and the tumor size for 27 HCC patients is shown.
