# Supplementary material for: Genome-scale detection of hypermethylated CpG islands in circulating cell-free DNA of hepatocellular carcinoma patients
Source: PubMed Central journal article supplement — Cell Res. 2015 Oct 30;25(11):1250–64. doi: 10.1038/cr.2015.126 (PMC4650428; doi:10.1038/cr.2015.126), 2015-10-30
Supplement: cr2015126x15.pdf [file cr2015126x15.pdf]

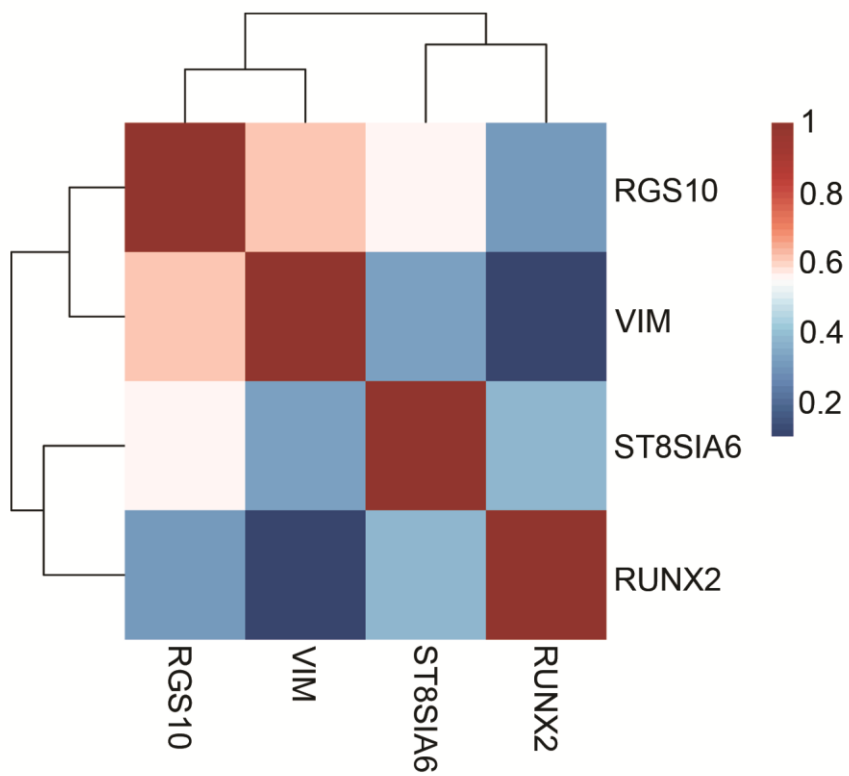

**Figure S15. Type I markers correlation.**

Spearman correlations of four markers in classifier I among 27 HCC tissue samples were shown.
