# Supplementary material for: Genome-scale detection of hypermethylated CpG islands in circulating cell-free DNA of hepatocellular carcinoma patients
Source: PubMed Central journal article supplement — Cell Res. 2015 Oct 30;25(11):1250–64. doi: 10.1038/cr.2015.126 (PMC4650428; doi:10.1038/cr.2015.126), 2015-10-30
Supplement: cr2015126x16.pdf [file cr2015126x16.pdf]

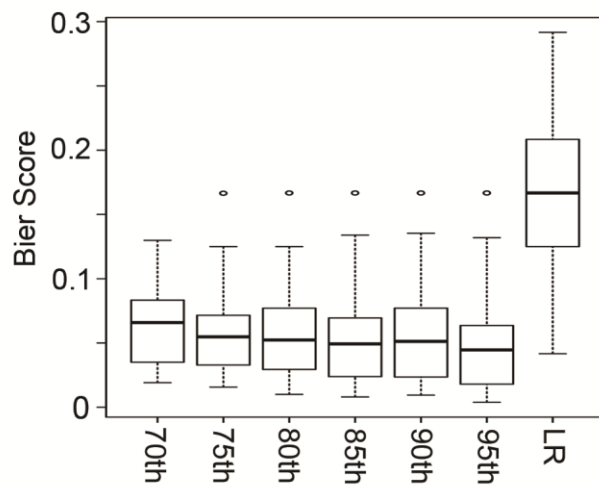

**Figure S16. Comparison of different models for classifier II.**

For both the logistic model (LR) and the model counting the number of hypermethylated markers, Brier Scores of 50 times random splitting and validation were calculated. For the latter, results of different cutoffs as 70th, 75th, 80th, 85th, 90th or 95th percentiles of the normal subjects to define a marker as hypermethylated were shown.
