# Supplementary material for: Genome-scale detection of hypermethylated CpG islands in circulating cell-free DNA of hepatocellular carcinoma patients
Source: PubMed Central journal article supplement — Cell Res. 2015 Oct 30;25(11):1250–64. doi: 10.1038/cr.2015.126 (PMC4650428; doi:10.1038/cr.2015.126), 2015-10-30
Supplement: cr2015126x17.pdf [file cr2015126x17.pdf]

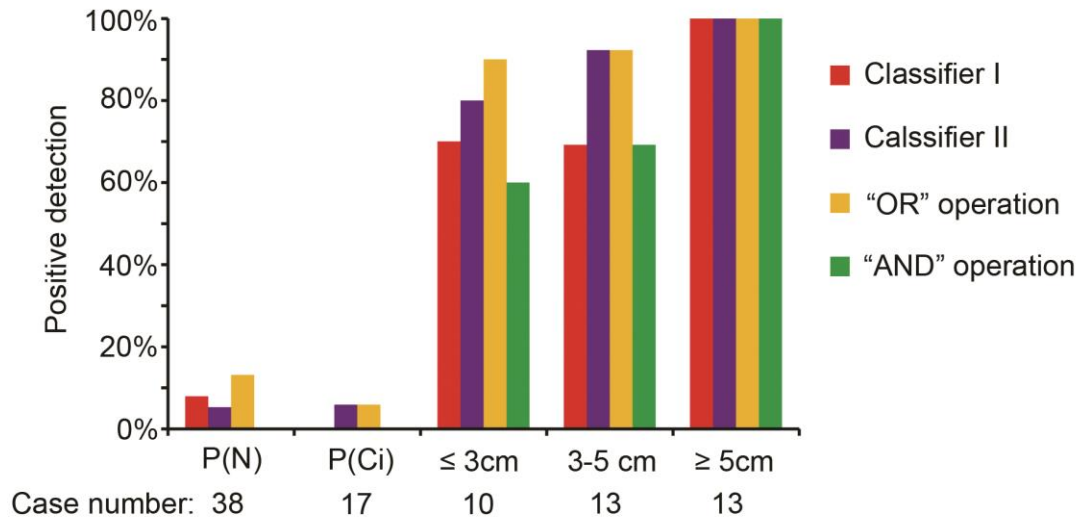

**Figure S17. Sensitivity of MCTA-Seq for detecting HCC.**

The positively detected cases in proportion to all tested cases using single or combined classifiers were shown for the HCC patients with tumor  $\leq 3$  cm, 3-5 cm or  $> 5$ cm, and the cirrhosis patients and the normal individuals.
