# Supplementary material for: Genome-scale detection of hypermethylated CpG islands in circulating cell-free DNA of hepatocellular carcinoma patients
Source: PubMed Central journal article supplement — Cell Res. 2015 Oct 30;25(11):1250–64. doi: 10.1038/cr.2015.126 (PMC4650428; doi:10.1038/cr.2015.126), 2015-10-30
Supplement: cr2015126x18.pdf [file cr2015126x18.pdf]

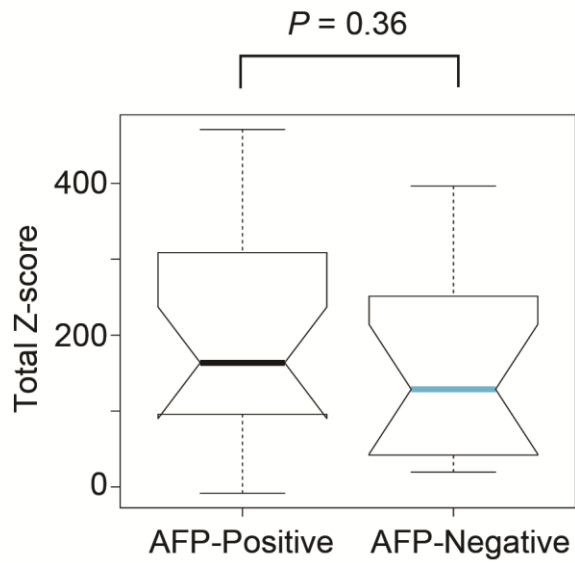

**Figure S18. Methylation marker and AFP Comparison.**

Boxplots showing the total Z-scores of the cffDNA methylation markers in classifier I and II for the AFP-positive and AFP-negative HCC patients.

Two-tailed MWW test.
