# Supplementary material for: Genome-scale detection of hypermethylated CpG islands in circulating cell-free DNA of hepatocellular carcinoma patients
Source: PubMed Central journal article supplement — Cell Res. 2015 Oct 30;25(11):1250–64. doi: 10.1038/cr.2015.126 (PMC4650428; doi:10.1038/cr.2015.126), 2015-10-30
Supplement: cr2015126x19.pdf [file cr2015126x19.pdf]

**Table S1. Sequencing information.**

|                        | Group                                           | Sample number | Raw reads (pair-end, million, means $\pm$ s.d.) | Uniquely mapped reads (million, means $\pm$ s.d.) | Bisulfite conversion rates (% , means $\pm$ s.d.) |
|------------------------|-------------------------------------------------|---------------|-------------------------------------------------|---------------------------------------------------|---------------------------------------------------|
| Validation experiments | FMG, WBCs, HePG2, Hela and dilution experiments | 30            | 7.9 $\pm$ 2.8                                   | 3.2 $\pm$ 1.2                                     | 98.86 $\pm$ 0.19                                  |
| T(HCC)                 | tissue                                          | 27            | 6.3 $\pm$ 2.3                                   | 2.1 $\pm$ 1.0                                     | 98.80 $\pm$ 0.18                                  |
| T(Aj)                  | tissue                                          | 27            | 6.7 $\pm$ 3.0                                   | 2.2 $\pm$ 0.8                                     | 98.63 $\pm$ 0.47                                  |
| T(NL)                  | tissue                                          | 3             | 5.3 $\pm$ 0.8                                   | 2.8 $\pm$ 0.3                                     | 98.90 $\pm$ 0.16                                  |
| P(HCC)                 | plasma (training)                               | 27            | 8.8 $\pm$ 2.7                                   | 3.3 $\pm$ 1.0                                     | 98.60 $\pm$ 0.37                                  |
| P(Ci)                  | plasma (training)                               | 17            | 7.8 $\pm$ 1.4                                   | 2.9 $\pm$ 0.6                                     | 98.51 $\pm$ 0.34                                  |
| P(N)                   | plasma (training)                               | 28            | 8.4 $\pm$ 2.6                                   | 3.0 $\pm$ 0.9                                     | 98.65 $\pm$ 0.44                                  |
| P(HCC)                 | plasma (testing)                                | 9             | 7.5 $\pm$ 2.5                                   | 2.7 $\pm$ 0.9                                     | 98.49 $\pm$ 0.11                                  |
| P(N)                   | plasma (testing)                                | 10            | 8.9 $\pm$ 2.6                                   | 4.5 $\pm$ 1.9                                     | 98.51 $\pm$ 0.13                                  |

Note: T(HCC), T(Aj) and T(NL) represent HCC tissues, adjacent noncancerous tissues and normal liver tissues, respectively. P(HCC), P(Ci) and P(N) represent plasma samples obtained from HCC patients, cirrhosis patients and normal individuals, respectively. The bisulfite conversion rates were assessed by lambda DNA as spike-in.
